# Supplementary material for: The Impact of COVID-19 on Hyperhidrosis Patients in the Mental Health and Quality of Life: A Web-Based Surveillance Study
Source: J Clin Med. 2022 Jun 21;11(13):3576. doi: 10.3390/jcm11133576 (PMC9267178; doi:10.3390/jcm11133576)

Supplementary Table S1. Online questionnaire for the study

| <b><u>COVID-19 related questionnaire</u></b>                                                                                                 |                                                                                  |      |      |      |           |
|----------------------------------------------------------------------------------------------------------------------------------------------|----------------------------------------------------------------------------------|------|------|------|-----------|
| <b>Question 1. After the COVID-19 pandemic, how would you rate the quality of life considering your hyperhidrosis symptoms and severity?</b> |                                                                                  |      |      |      |           |
| <b>NO</b>                                                                                                                                    | <b>Answer</b>                                                                    |      |      |      |           |
| 1                                                                                                                                            | <b>Working environment</b>                                                       |      |      |      |           |
|                                                                                                                                              | Very good                                                                        | Good | Same | Poor | Very poor |
| 2                                                                                                                                            | <b>The use of public spaces</b>                                                  |      |      |      |           |
|                                                                                                                                              | Very good                                                                        | Good | Same | Poor | Very poor |
| 3                                                                                                                                            | <b>Academic activity (exam, interview, study)</b>                                |      |      |      |           |
|                                                                                                                                              | Very good                                                                        | Good | Same | Poor | Very poor |
| 4                                                                                                                                            | <b>Digital life (the use of smartphone, devices and computers)</b>               |      |      |      |           |
|                                                                                                                                              | Very good                                                                        | Good | Same | Poor | Very poor |
| 5                                                                                                                                            | <b>Hobbies and leisure activity</b>                                              |      |      |      |           |
|                                                                                                                                              | Very good                                                                        | Good | Same | Poor | Very poor |
| 6                                                                                                                                            | <b>Intimate personal contacts (holding hands, hug, kiss, sexual intercourse)</b> |      |      |      |           |
|                                                                                                                                              | Very good                                                                        | Good | Same | Poor | Very poor |
| 7                                                                                                                                            | <b>Public speaking or presentation</b>                                           |      |      |      |           |
|                                                                                                                                              | Very good                                                                        | Good | Same | Poor | Very poor |
| 8                                                                                                                                            | <b>Dressing (clothes, gloves, shoes, boots)</b>                                  |      |      |      |           |
|                                                                                                                                              | Very good                                                                        | Good | Same | Poor | Very poor |
| 9                                                                                                                                            | <b>Interpersonal relationship</b>                                                |      |      |      |           |
|                                                                                                                                              | Very good                                                                        | Good | Same | Poor | Very poor |

**Question 2. How would you rate the following problems related to hyperhidrosis during the COVID-19 pandemic?**

| NO | Answer                                                                                 |                                                                                                                                                                                                                                                                                                |
|----|----------------------------------------------------------------------------------------|------------------------------------------------------------------------------------------------------------------------------------------------------------------------------------------------------------------------------------------------------------------------------------------------|
| 10 | Did you experience the change of symptoms during the pandemic?                         | <ul style="list-style-type: none"> <li>① Much worsened</li> <li>② Worsened</li> <li>③ Same as usual</li> <li>④ Better</li> <li>⑤ Much Better</li> </ul>                                                                                                                                        |
| 11 | Was it difficult to have appropriate management for hyperhidrosis during the pandemic? | <ul style="list-style-type: none"> <li>① Yes</li> <li>② Same as the pre-pandemic period</li> <li>③ No</li> </ul>                                                                                                                                                                               |
| 12 | If you had problems in treatments during the pandemic, what were specific problems?    | <ul style="list-style-type: none"> <li>① No difficulty</li> <li>② Visit to outpatient clinics</li> <li>③ Worsened symptoms</li> <li>④ Communication with physicians</li> <li>⑤ Side effects</li> <li>⑥ Insufficient information</li> <li>⑦ Inaccurate information</li> <li>⑧ Others</li> </ul> |

|                                                                                                       |                                                           |                                                                                                                                                                                                                                                                        |              |                         |                 |
|-------------------------------------------------------------------------------------------------------|-----------------------------------------------------------|------------------------------------------------------------------------------------------------------------------------------------------------------------------------------------------------------------------------------------------------------------------------|--------------|-------------------------|-----------------|
| 13                                                                                                    | What kinds of treatment you received during the pandemic? | ① No treatment<br>② Self-medication/Pharmacy<br>③ Herbal medicine<br>④ Health supplements<br>⑤ Surgery<br>⑥ Outpatient visit to dermatologists<br>⑦ Outpatient visit to thoracic surgeons<br>⑧ Mobile consultation<br>⑨ Leisure activity<br>⑩ Diet therapy<br>⑪ Others |              |                         |                 |
| <b>Q. Over the last two weeks, how often have you been bothered by any of the following problems?</b> |                                                           |                                                                                                                                                                                                                                                                        |              |                         |                 |
| Over the last two weeks,                                                                              |                                                           | Not at all                                                                                                                                                                                                                                                             | Several days | More than half the days | Nearly everyday |
| 14                                                                                                    | Little interest or pleasure in doing things?              | 0                                                                                                                                                                                                                                                                      | 1            | 2                       | 3               |
| 15                                                                                                    | Feeling down, depressed, or hopeless?                     | 0                                                                                                                                                                                                                                                                      | 1            | 2                       | 3               |
| 16                                                                                                    | Trouble falling or staying asleep, or sleeping too much?  | 0                                                                                                                                                                                                                                                                      | 1            | 2                       | 3               |

|                               |                                                                                                                                                                              |   |   |   |   |
|-------------------------------|------------------------------------------------------------------------------------------------------------------------------------------------------------------------------|---|---|---|---|
| 17                            | Feeling tired or having little energy?                                                                                                                                       | 0 | 1 | 2 | 3 |
| 18                            | Poor appetite or overeating?                                                                                                                                                 | 0 | 1 | 2 | 3 |
| 19                            | Feeling bad about yourself - or that you are a failure or have let yourself or your family down?                                                                             | 0 | 1 | 2 | 3 |
| 20                            | Trouble concentrating on things, such as reading the newspaper or watching television?                                                                                       | 0 | 1 | 2 | 3 |
| 21                            | Moving or speaking so slowly that other people could have noticed?<br>Or the opposite - being so fidgety or restless that you have been moving around a lot more than usual? | 0 | 1 | 2 | 3 |
| 22                            | Thoughts that you would be better off dead, or of hurting yourself in some way?                                                                                              | 0 | 1 | 2 | 3 |
| <b>Total score<br/>(0-27)</b> |                                                                                                                                                                              |   |   |   |   |

**Supplementary Table S2. Age/gender/disease duration-matched participants' demographic, hyperhidrosis characteristics, and PHQ-9 score**

|                                  | Male<br>n=84         | Female<br>n=84       | <i>P value</i> |
|----------------------------------|----------------------|----------------------|----------------|
| <i>Demographics</i>              |                      |                      |                |
| Age                              | 39.00 [33.75, 44.25] | 39.00 [33.75, 44.25] | 0.93           |
| Age group                        |                      |                      | 0.957          |
| 20-29                            | 8 ( 9.5)             | 11 ( 13.1)           |                |
| 30-39                            | 35 ( 41.7)           | 33 ( 39.3)           |                |
| 40-49                            | 32 ( 38.1)           | 31 ( 36.9)           |                |
| 50-59                            | 8 ( 9.5)             | 8 ( 9.5)             |                |
| 60+                              | 1 ( 1.2)             | 1 ( 1.2)             |                |
| Marital status                   |                      |                      | 0.758          |
| married                          | 42 ( 50.0)           | 39 ( 46.4)           |                |
| unmarried                        | 42 ( 50.0)           | 45 ( 53.6)           |                |
| Residential area                 |                      |                      |                |
| Small town                       | 28 ( 33.3)           | 25 ( 29.8)           | 0.740          |
| Urban/Metropolitan area          | 56 ( 66.7)           | 59 ( 70.2)           |                |
| <i>Depression related</i>        |                      |                      |                |
| PHQ-9 mean (SD)                  | 4.05 (5.24)          | 6.96 (6.77)          | <b>0.002</b>   |
| PHQ-9 median (IQR)               | 2.00 [0.00, 6.00]    | 4.00 [2.00, 10.25]   | <b>0.001</b>   |
| Mild Depression <sup>†</sup>     | 26 ( 31.0)           | 41 ( 48.8)           | <b>0.027</b>   |
| Moderate Depression <sup>*</sup> | 14 ( 16.7)           | 26 ( 31.0)           | <b>0.045</b>   |
| <i>Hyperhidrosis related</i>     |                      |                      |                |
| Duration                         | 30.00 [20.00, 32.50] | 29.00 [20.75, 35.00] | 0.620          |
| Axilla                           | 38 ( 45.2)           | 51 ( 60.7)           | 0.063          |
| Palmar                           | 59 ( 70.2)           | 63 ( 75.0)           | 0.604          |
| Plantar                          | 60 ( 71.4)           | 64 ( 76.2)           | 0.599          |
| Facial                           | 32 ( 38.1)           | 29 ( 34.5)           | 0.748          |
| Multiple                         | 67 ( 79.8)           | 75 ( 89.3)           | 0.134          |
| <i>Comorbidity<sup>**</sup></i>  |                      |                      |                |

|                           |            |            |                     |
|---------------------------|------------|------------|---------------------|
| Gastrointestinal diseases | 27 ( 32.1) | 37 ( 44.0) | <i>0.153</i>        |
| Obesity                   | 27 ( 32.1) | 23 ( 27.4) | <i>0.613</i>        |
| Anxiety                   | 13 ( 15.5) | 19 ( 22.6) | <i>0.326</i>        |
| Depression                | 13 ( 15.5) | 22 ( 26.2) | <i>0.128</i>        |
| Hypertension              | 14 ( 16.7) | 4 ( 4.8)   | <b><i>0.023</i></b> |
| Diabetes mellitus         | 5 ( 6.0)   | 2 ( 2.4)   | <i>0.443</i>        |
| Neurologic disorder       | 8 ( 9.5)   | 8 ( 9.5)   | <i>1</i>            |

---

BMI, body-mass index; SD, standard deviation; IQR, interquartile range; PHQ-9, patient health questionnaire-9

¶ Patients with PHQ-9 score 5 or above

\* Patients with PHQ-9 score 10 or above

\*This is based on the patients' self-report not previous medical records

**Supplementary Table S3. Age/gender/disease duration matched participants' demographic, hyperhidrosis characteristics and PHQ-9 score**

|                                                   | Male       | Female     | P value      |
|---------------------------------------------------|------------|------------|--------------|
|                                                   | n=84       | n=84       |              |
| <i>Quality of life problems</i>                   |            |            |              |
| Use of public spaces, (%)                         | 34 ( 40.5) | 49 ( 58.3) | <b>0.030</b> |
| Working environments (%)                          | 11 ( 13.1) | 21 ( 25.0) | 0.076        |
| Interpersonal relationship (%)                    | 32 ( 38.1) | 46 ( 54.8) | <b>0.044</b> |
| Public speaking or presentation (%)               | 43 ( 51.2) | 58 ( 69.0) | <b>0.027</b> |
| Digital life <sup>†</sup> (%)                     | 23 ( 27.4) | 29 ( 34.5) | 0.404        |
| Intimate personal contacts (%)                    | 49 ( 58.3) | 57 ( 67.9) | 0.263        |
| Dressing (%)                                      | 37 ( 44.0) | 47 ( 56.0) | 0.165        |
| Hobbies and leisure activity (%)                  | 25 ( 29.8) | 35 ( 41.7) | 0.147        |
| Academic activity (%)                             | 35 ( 41.7) | 44 ( 52.4) | 0.216        |
| <i>Change in symptoms</i>                         |            |            | 0.576        |
| Improved                                          | 3 ( 3.6)   | 2 ( 2.4)   |              |
| Same as usual                                     | 74 ( 88.1) | 70 ( 83.3) |              |
| Worsened                                          | 7 ( 8.3)   | 12 ( 14.3) |              |
| <i>Problems in treatments during the pandemic</i> |            |            |              |
| No problem                                        | 62 ( 73.8) | 55 ( 65.5) | 0.314        |
| Information related issues                        | 11 ( 13.1) | 13 ( 15.5) | 0.826        |
| Inaccurate information                            | 5 ( 6.0)   | 4 ( 4.8)   | 1            |
| Insufficient information                          | 8 ( 9.5)   | 12 ( 14.3) | 0.476        |
| Visit to outpatient clinics                       | 11 ( 13.1) | 10 ( 11.9) | 1            |
| Side effects                                      | 4 ( 4.8)   | 4 ( 4.8)   | 1            |
| Communication with physicians                     | 3 ( 3.6)   | 1 ( 1.2)   | 0.622        |
| <i>Treatments received during the pandemic</i>    |            |            |              |
| No treatment                                      | 47 ( 56.0) | 35 ( 41.7) | 0.089        |

|                                |            |            |              |
|--------------------------------|------------|------------|--------------|
| Self-medication**              | 17 ( 20.2) | 30 ( 35.7) | <b>0.039</b> |
| OPD visit to thoracic surgeons | 8 ( 9.5)   | 6 ( 7.1)   | 0.781        |
| OPD visit to dermatologist     | 2 ( 2.4)   | 4 ( 4.8)   | 0.682        |
| Surgery                        | 3 ( 3.6)   | 0 ( 0.0)   | 0.246        |
| Diet therapy                   | 7 ( 8.3)   | 6 ( 7.1)   | 1            |
| Leisure activity               | 6 ( 7.1)   | 5 ( 6.0)   | 1            |
| Herbal medicine                | 1 ( 1.2)   | 1 ( 1.2)   | 1            |
| Mobile consultation            | 0 ( 0.0)   | 1 ( 1.2)   | 1            |
| Health supplement              | 4 ( 4.8)   | 6 ( 7.1)   | 0.746        |
| Others                         | 8 ( 9.5)   | 10 ( 11.9) | 0.804        |

---

OPD, outpatient department

¶ It includes inconvenience related to the use of smartphone and electronic devices

\*\* Over the counter drugs, aesthetic products and the use of topical agents such as aluminum chloride

**Supplementary Figure S1(a). The Spearman's rank correlation between PHQ-9 and age**

- **PHQ-9 and Age**

- Spearman's rank correlation coefficient -0.264
- P value = 0.0000691

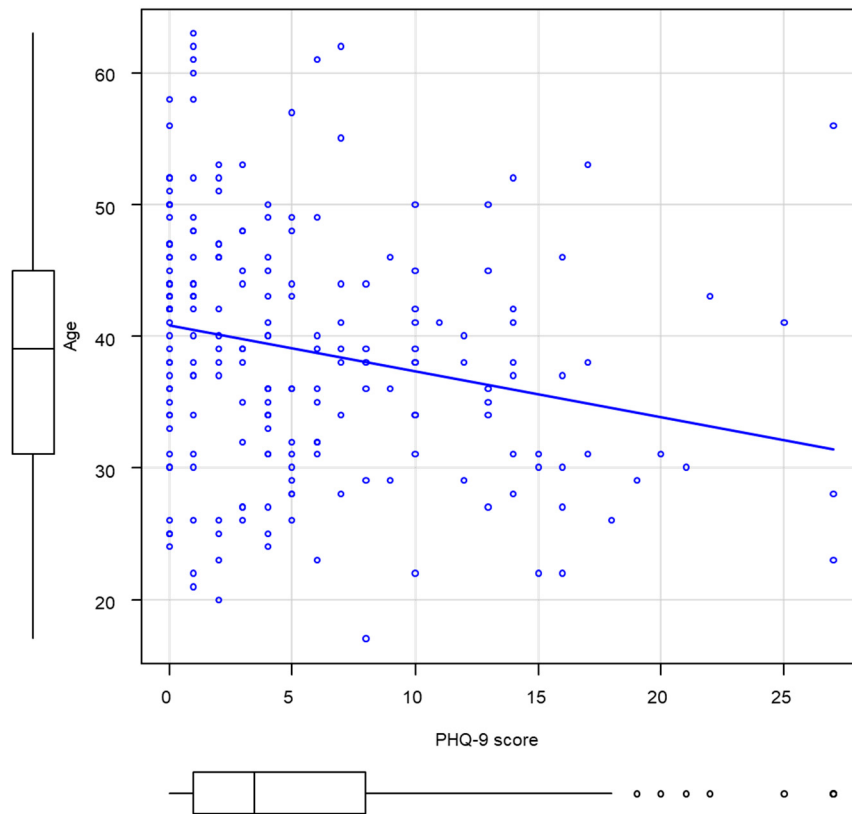

**Supplementary Figure S1(b). The Spearman's rank correlation between PHQ-9 and the hyperhidrosis duration**

- **PHQ-9 and Hyperhidrosis duration**

- Spearman's rank correlation coefficient -0.212
- P value = 0.00149

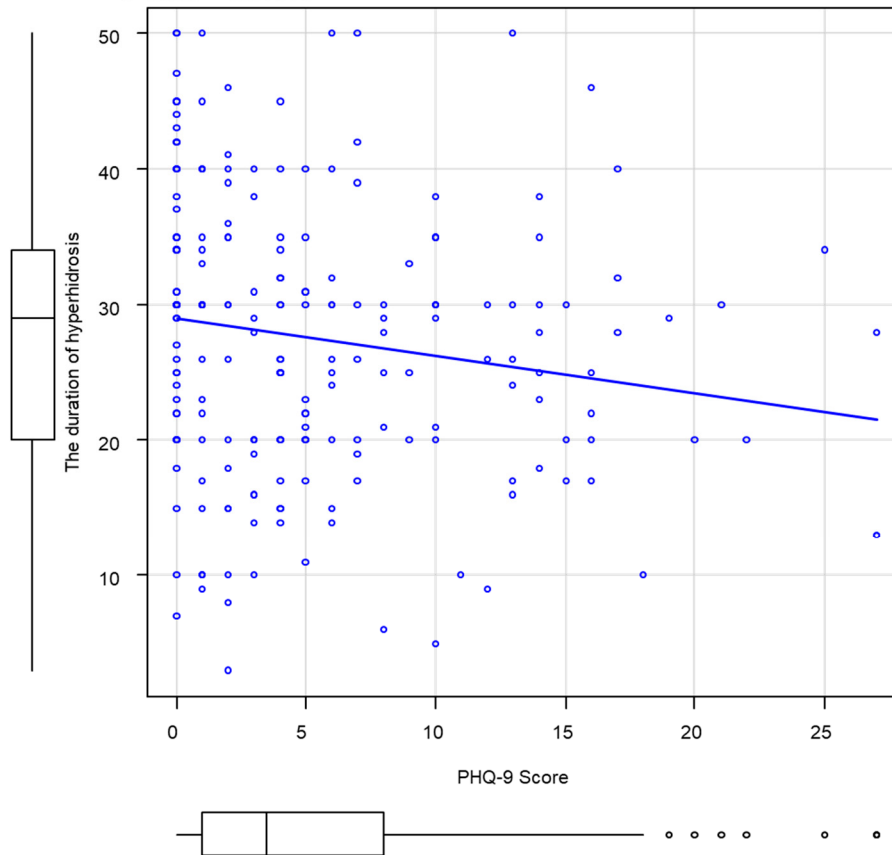

**Supplementary Figure S1(c). The Spearman's rank correlation between PHQ-9 and body-mass index**

- **PHQ-9 and BMI**
- Spearman's rank correlation coefficient -0.127
- P value = 0.0597

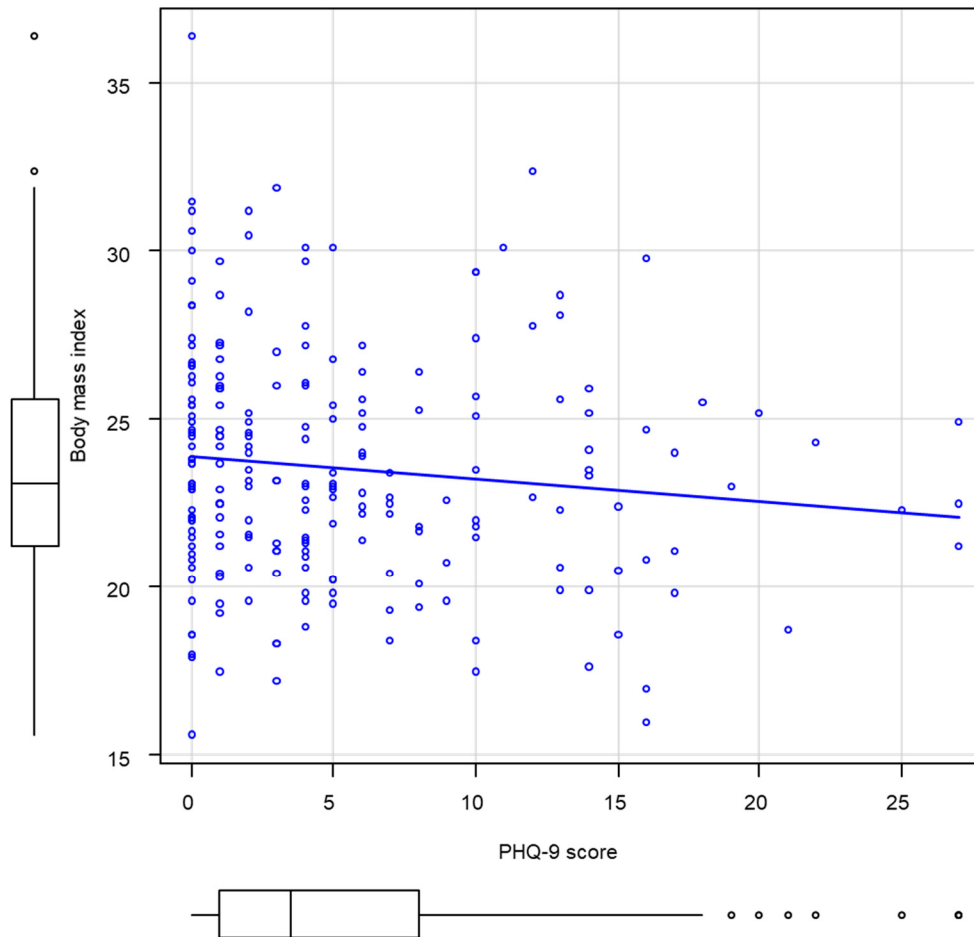

Supplement: Supplementary file 1 [file jcm-11-03576-s001.zip › jcm-1768857-supplementary.pdf]
